# Supplementary material for: Report on Landsat 8 and Sentinel-2B observations of the Nord Stream 2 pipeline methane leak
Source: Copernicus journal article supplement (doi:10.5194/amt-17-2777-2024), 2024-05-08
Supplement: Supplementary file 1 [file amt-17-2777-2024-supplement.pdf]

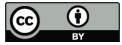

*Supplement of*

## **Report on Landsat 8 and Sentinel-2B observations of the Nord Stream 2 pipeline methane leak**

**Matthieu Dogniaux et al.**

*Correspondence to:* Matthieu Dogniaux (m.dogniaux@sron.nl)

The copyright of individual parts of the supplement might differ from the article licence.

Tables S1, S2 and S3 list all the 2-km-side satellite images used in this work. Figures S1 to S7 show all individual fits for sea foam observations in boat trails. Figure S8 shows the effective wind calibration dataset, and Figures S9 and S10 support the calculation of first-order sensitivity indices.

Table S1: Nord Stream 2 (NS2) leak satellite images used in this work

| <b>Satellite</b> | <b>date</b> | <b>Latitude</b> | <b>Longitude</b> | <b>Filters</b>                                                                                                                                           |
|------------------|-------------|-----------------|------------------|----------------------------------------------------------------------------------------------------------------------------------------------------------|
| Landsat 8        | 2022-09-29  | 54.877          | 15.409           | <u>Still sea:</u><br>$s_2 < 0.04$ and $s_1 \leq 1.65 s_2$<br><u>Clouds:</u> $s_2 \geq 0.04$<br><u>NS2 sea foam:</u><br>$s_2 < 0.04$ and $s_1 > 1.65 s_2$ |
| Sentinel-2B      | 2022-09-30  | 54.877          | 15.409           | <u>Still sea:</u> $s_1 \leq 0.0045$<br><u>NS2 sea foam:</u> $s_1 > 0.0045$<br>No cloud filtering required for this S-2B image                            |

Table S2: Landsat 8 ship trail images used in this work

| #  | Satellite | date       | Latitude | Longitude | $\tau_1$ | $\tau_2$ | $c_i$ |
|----|-----------|------------|----------|-----------|----------|----------|-------|
| 1  | Landsat 8 | 2022-09-02 | 55.972   | 11.196    | 0.0075   | 0.0400   | 1.92  |
| 2  | Landsat 8 | 2022-09-02 | 54.598   | 11.305    | 0.0050   | 0.0300   | 1.86  |
| 3  | Landsat 8 | 2022-09-02 | 54.268   | 11.699    | 0.0050   | 0.0250   | 1.64  |
| 4  | Landsat 8 | 2022-09-06 | 58.814   | 18.071    | 0.0050   | 0.0300   | 1.75  |
| 5  | Landsat 8 | 2022-09-10 | 59.847   | 25.522    | 0.0035   | 0.0250   | 1.58  |
| 6  | Landsat 8 | 2022-09-11 | 54.537   | 12.220    | 0.0035   | 0.0200   | 1.80  |
| 7  | Landsat 8 | 2022-09-11 | 54.527   | 12.245    | 0.0040   | 0.0400   | 1.56  |
| 8  | Landsat 8 | 2022-09-16 | 57.619   | 9.834     | 0.0080   | 0.0600   | 2.19  |
| 9  | Landsat 8 | 2022-09-16 | 57.627   | 9.851     | 0.0070   | 0.0250   | 1.89  |
| 10 | Landsat 8 | 2022-09-16 | 57.634   | 9.897     | 0.0080   | 0.0300   | 2.05  |
| 11 | Landsat 8 | 2022-09-16 | 57.682   | 9.814     | 0.0085   | 0.0300   | 1.76  |
| 12 | Landsat 8 | 2022-09-16 | 56.734   | 7.976     | 0.0080   | 0.0300   | 2.22  |
| 13 | Landsat 8 | 2022-09-25 | 57.122   | 10.760    | 0.0055   | 0.0300   | 1.98  |
| 14 | Landsat 8 | 2022-09-25 | 54.131   | 8.013     | 0.0065   | 0.0150   | 2.43  |
| 15 | Landsat 8 | 2022-10-02 | 57.611   | 9.921     | 0.0080   | 0.0250   | 1.99  |
| 16 | Landsat 8 | 2022-10-02 | 57.721   | 8.481     | 0.0055   | 0.0200   | 2.04  |
| 17 | Landsat 8 | 2022-10-02 | 57.574   | 8.855     | 0.0075   | 0.0200   | 2.25  |
| 18 | Landsat 8 | 2022-10-02 | 57.563   | 8.884     | 0.0065   | 0.0300   | 1.76  |
| 19 | Landsat 8 | 2022-10-04 | 54.461   | 10.261    | 0.0080   | 0.0150   | 2.10  |
| 20 | Landsat 8 | 2022-10-06 | 63.508   | 20.536    | 0.0065   | 0.0300   | 2.05  |
| 21 | Landsat 8 | 2022-10-06 | 54.878   | 13.070    | 0.0100   | 0.0300   | 1.79  |
| 22 | Landsat 8 | 2022-10-10 | 58.846   | 21.509    | 0.0070   | 0.0300   | 1.83  |
| 23 | Landsat 8 | 2022-10-15 | 56.613   | 17.809    | 0.0115   | 0.0300   | 1.88  |
| 24 | Landsat 8 | 2022-10-18 | 57.614   | 9.918     | 0.0105   | 0.0300   | 2.25  |
| 25 | Landsat 8 | 2022-10-18 | 57.674   | 9.774     | 0.0100   | 0.0500   | 2.45  |

Continued on next page

Table S2: Landsat 8 ship trail images used in this work (Continued)

| #  | Satellite | date       | Latitude | Longitude | $\tau_1$ | $\tau_2$ | $c_i$ |
|----|-----------|------------|----------|-----------|----------|----------|-------|
| 26 | Landsat 8 | 2022-10-20 | 55.957   | 11.260    | 0.0250   | 0.0350   | 2.09  |
| 27 | Landsat 8 | 2022-10-20 | 55.169   | 12.888    | 0.0070   | 0.0200   | 1.79  |

Table S3: Sentinel-2B ship trail images used in this work

| #  | Satellite   | date       | Latitude | Longitude | $\tau_1$ | $\tau_2$ | $c_i$ |
|----|-------------|------------|----------|-----------|----------|----------|-------|
| 1  | Sentinel-2B | 2022-09-02 | 56.748   | 7.958     | 0.0040   | 0.0400   | 1.75  |
| 2  | Sentinel-2B | 2022-09-02 | 56.700   | 7.823     | 0.0040   | 0.0400   | 1.91  |
| 3  | Sentinel-2B | 2022-09-03 | 54.369   | 11.981    | 0.0050   | 0.0400   | 1.64  |
| 4  | Sentinel-2B | 2022-09-03 | 54.390   | 11.992    | 0.0050   | 0.0400   | 1.85  |
| 5  | Sentinel-2B | 2022-09-06 | 56.851   | 11.812    | 0.0080   | 0.0600   | 1.67  |
| 6  | Sentinel-2B | 2022-09-06 | 56.856   | 11.840    | 0.0090   | 0.0300   | 1.77  |
| 7  | Sentinel-2B | 2022-09-06 | 57.456   | 11.453    | 0.0070   | 0.0300   | 1.85  |
| 8  | Sentinel-2B | 2022-09-07 | 54.574   | 18.878    | 0.0045   | 0.0400   | 1.69  |
| 9  | Sentinel-2B | 2022-09-09 | 55.789   | 10.741    | 0.0115   | 0.0350   | 1.77  |
| 10 | Sentinel-2B | 2022-09-13 | 54.530   | 11.427    | 0.0090   | 0.0200   | 1.67  |
| 11 | Sentinel-2B | 2022-09-13 | 54.541   | 11.410    | 0.0080   | 0.0150   | 1.63  |
| 12 | Sentinel-2B | 2022-09-13 | 54.315   | 11.833    | 0.0070   | 0.0400   | 1.80  |
| 13 | Sentinel-2B | 2022-09-16 | 56.032   | 10.737    | 0.0200   | 0.0375   | 2.46  |
| 14 | Sentinel-2B | 2022-09-19 | 57.676   | 9.673     | 0.0070   | 0.0400   | 1.95  |
| 15 | Sentinel-2B | 2022-09-19 | 57.464   | 10.935    | 0.0120   | 0.0300   | 2.04  |
| 16 | Sentinel-2B | 2022-09-19 | 57.472   | 8.615     | 0.0045   | 0.0500   | 1.76  |
| 17 | Sentinel-2B | 2022-09-30 | 54.982   | 18.303    | 0.0050   | 0.0500   | 1.97  |
| 18 | Sentinel-2B | 2022-09-30 | 54.876   | 17.373    | 0.0040   | 0.0350   | 1.59  |
| 19 | Sentinel-2B | 2022-09-30 | 54.830   | 13.773    | 0.0070   | 0.0300   | 2.09  |
| 20 | Sentinel-2B | 2022-09-30 | 54.304   | 13.980    | 0.0060   | 0.0400   | 1.82  |
| 21 | Sentinel-2B | 2022-10-02 | 57.681   | 9.873     | 0.0160   | 0.0350   | 2.22  |
| 22 | Sentinel-2B | 2022-10-02 | 57.794   | 9.230     | 0.0070   | 0.0410   | 2.12  |
| 23 | Sentinel-2B | 2022-10-03 | 54.613   | 11.309    | 0.0115   | 0.0400   | 2.09  |
| 24 | Sentinel-2B | 2022-10-03 | 54.629   | 11.311    | 0.0100   | 0.0500   | 2.07  |
| 25 | Sentinel-2B | 2022-10-06 | 54.448   | 12.055    | 0.0110   | 0.0400   | 1.58  |

Continued on next page

Table S3: Sentinel-2B ship trail images used in this work (Continued)

| #  | Satellite   | date       | Latitude | Longitude | $\tau_1$ | $\tau_2$ | $c_i$ |
|----|-------------|------------|----------|-----------|----------|----------|-------|
| 26 | Sentinel-2B | 2022-10-06 | 54.442   | 12.008    | 0.0110   | 0.0400   | 1.69  |
| 27 | Sentinel-2B | 2022-10-07 | 54.880   | 19.232    | 0.0110   | 0.0200   | 1.76  |
| 28 | Sentinel-2B | 2022-10-10 | 55.528   | 15.159    | 0.0110   | 0.0300   | 1.82  |
| 29 | Sentinel-2B | 2022-10-12 | 57.679   | 9.650     | 0.0110   | 0.0400   | 2.10  |
| 30 | Sentinel-2B | 2022-10-12 | 57.621   | 9.932     | 0.0080   | 0.0400   | 2.09  |
| 31 | Sentinel-2B | 2022-10-16 | 54.292   | 12.024    | 0.0070   | 0.0300   | 1.72  |
| 32 | Sentinel-2B | 2022-10-16 | 54.568   | 11.278    | 0.0105   | 0.0400   | 2.31  |
| 33 | Sentinel-2B | 2022-10-16 | 54.580   | 11.277    | 0.0090   | 0.0300   | 2.16  |
| 34 | Sentinel-2B | 2022-10-19 | 57.673   | 9.715     | 0.0045   | 0.0300   | 2.19  |
| 35 | Sentinel-2B | 2022-10-19 | 57.788   | 10.140    | 0.0050   | 0.0300   | 2.13  |
| 36 | Sentinel-2B | 2022-10-20 | 54.800   | 13.774    | 0.0200   | 0.0300   | 2.16  |
| 37 | Sentinel-2B | 2022-10-30 | 56.678   | 17.251    | 0.0070   | 0.0400   | 1.75  |
| 38 | Sentinel-2B | 2022-10-30 | 55.284   | 14.162    | 0.0210   | 0.0400   | 1.81  |

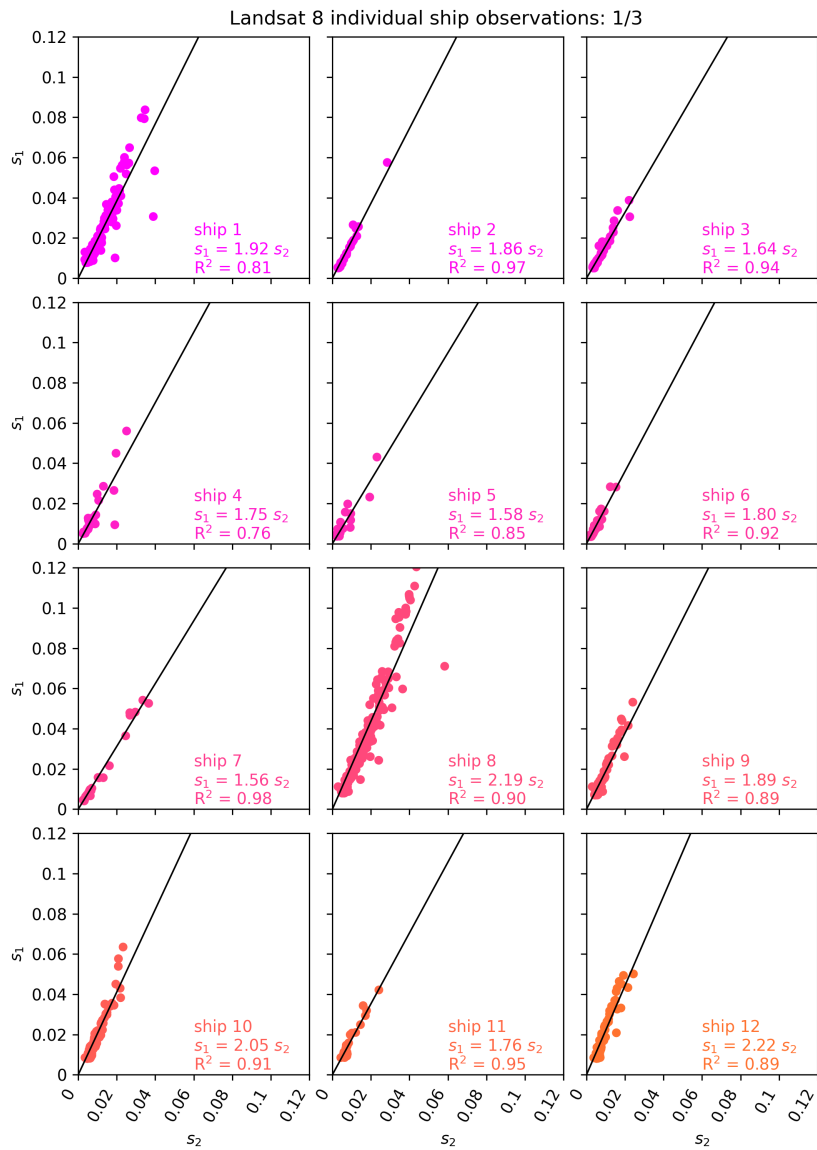

**Figure S1.** Individual Landsat 8 sea foam observations in ship trails and least-squares linear regression lines with intercepts forced to zero (1/3).

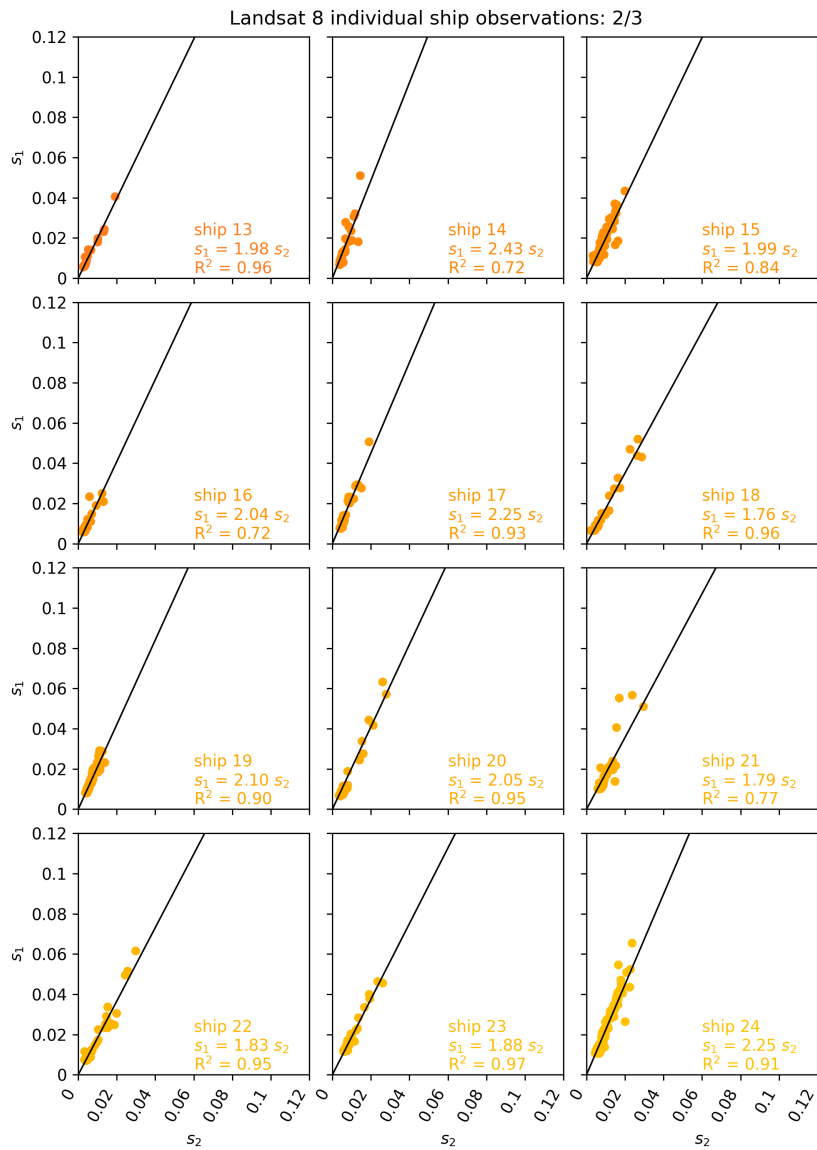

**Figure S2.** Individual Landsat 8 sea foam observations in ship trails and least-squares linear regression lines with intercepts forced to zero (2/3).



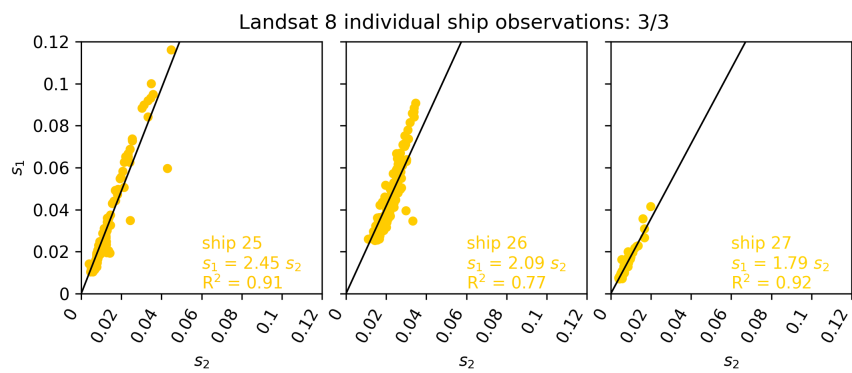

**Figure S3.** Individual Landsat 8 sea foam observations in ship trails and least-squares linear regression lines with intercepts forced to zero (3/3).

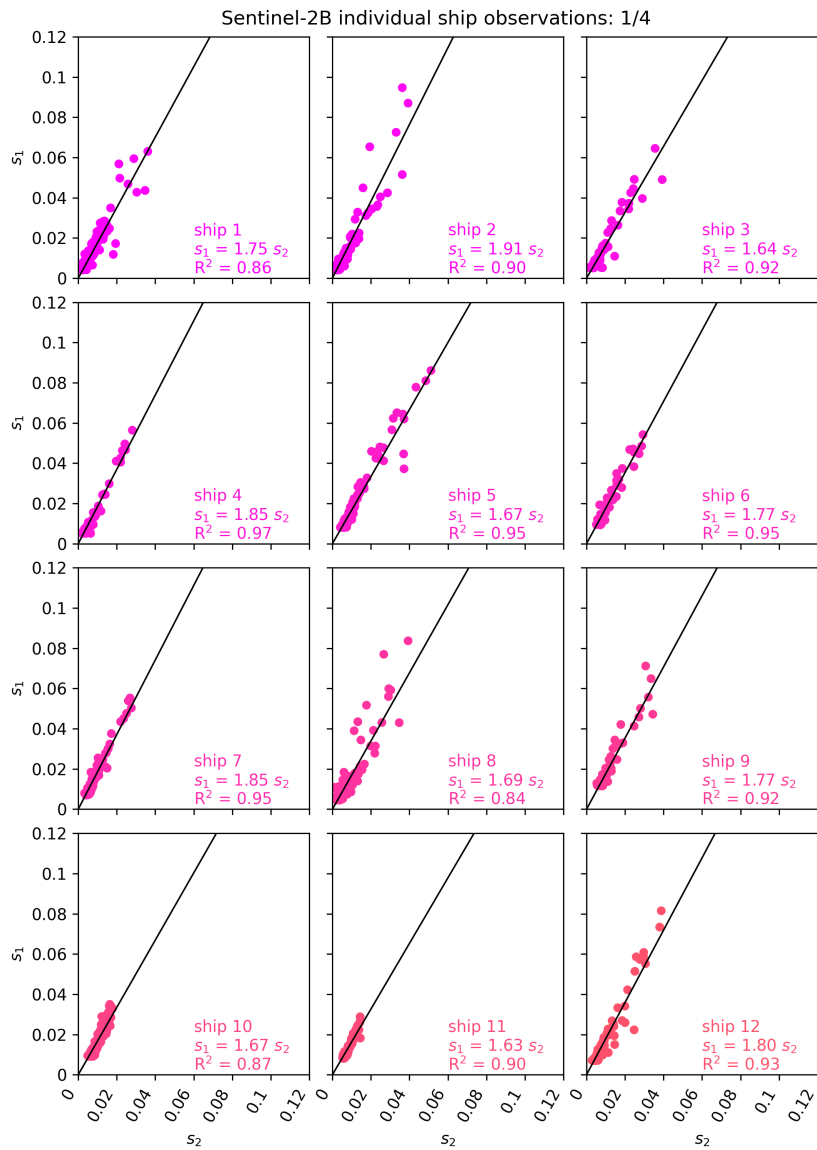

**Figure S4.** Individual Sentinel-2B sea foam observations in ship trails and least-squares linear regression lines with intercepts forced to zero (1/4).

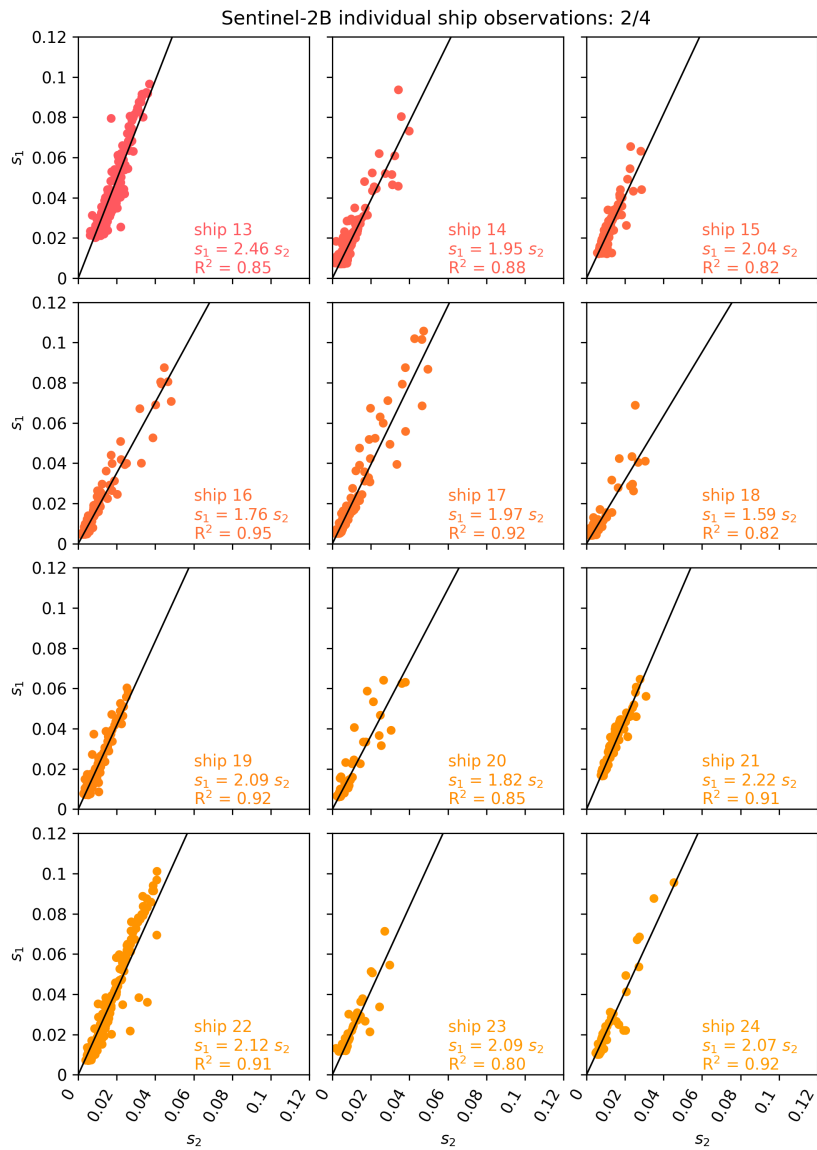

**Figure S5.** Individual Sentinel-2B sea foam observations in ship trails and least-squares linear regression lines with intercepts forced to zero (2/4).

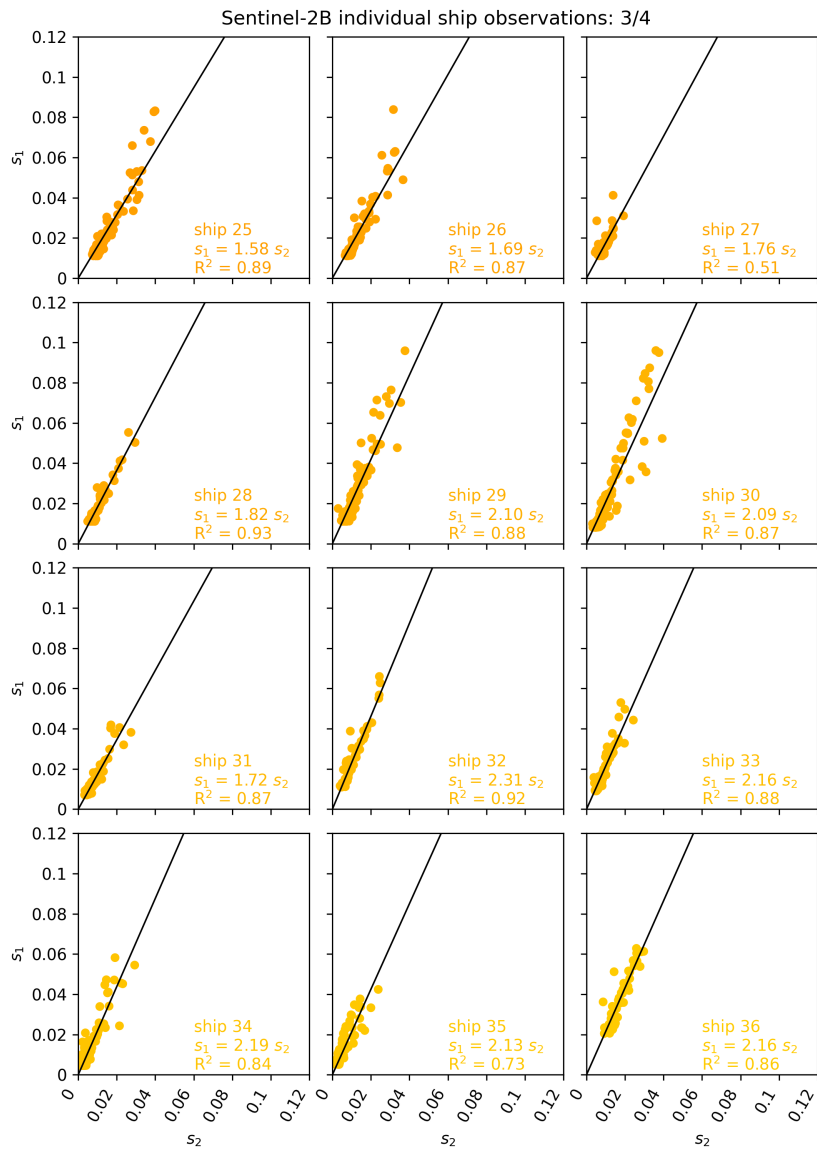

**Figure S6.** Individual Sentinel-2B sea foam observations in ship trails and least-squares linear regression lines with intercepts forced to zero (3/4).

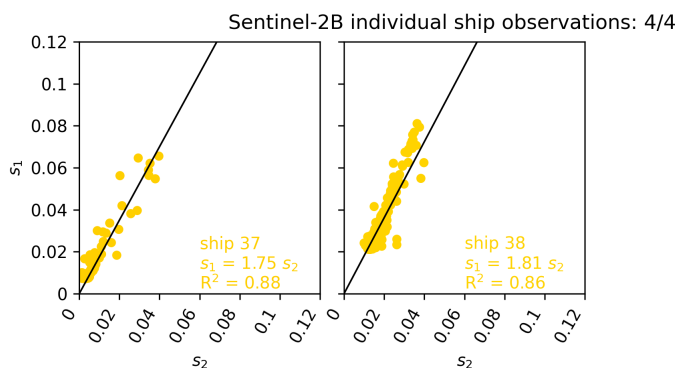

**Figure S7.** Individual Sentinel-2B sea foam observations in ship trails and least-squares linear regression lines with intercepts forced to zero (4/4).

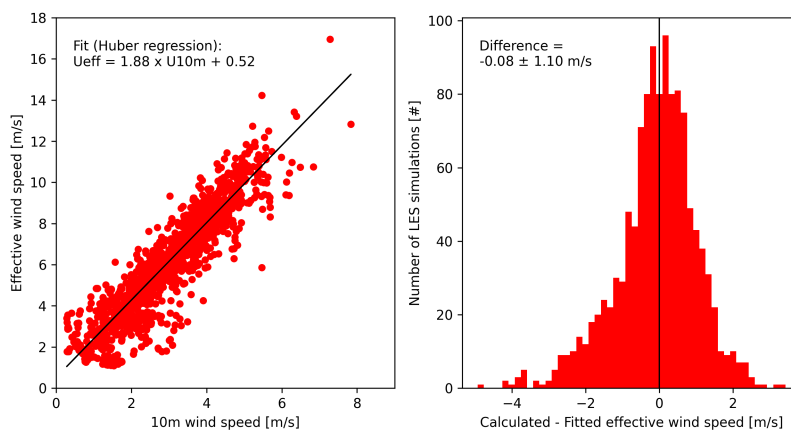

**Figure S8.** Calibration of IME effective wind speed against 10-m wind speed on the set of Large Eddy Simulation (LES) outputs from Maasakkers et al. (2022) for a  $275 \times 275 \text{ m}^2$  source area and sampled only over that same area (left). The distribution of calculated – fitted mismatches used in the Monte Carlo ensembles of Sect. 2.4 is given as well (right).

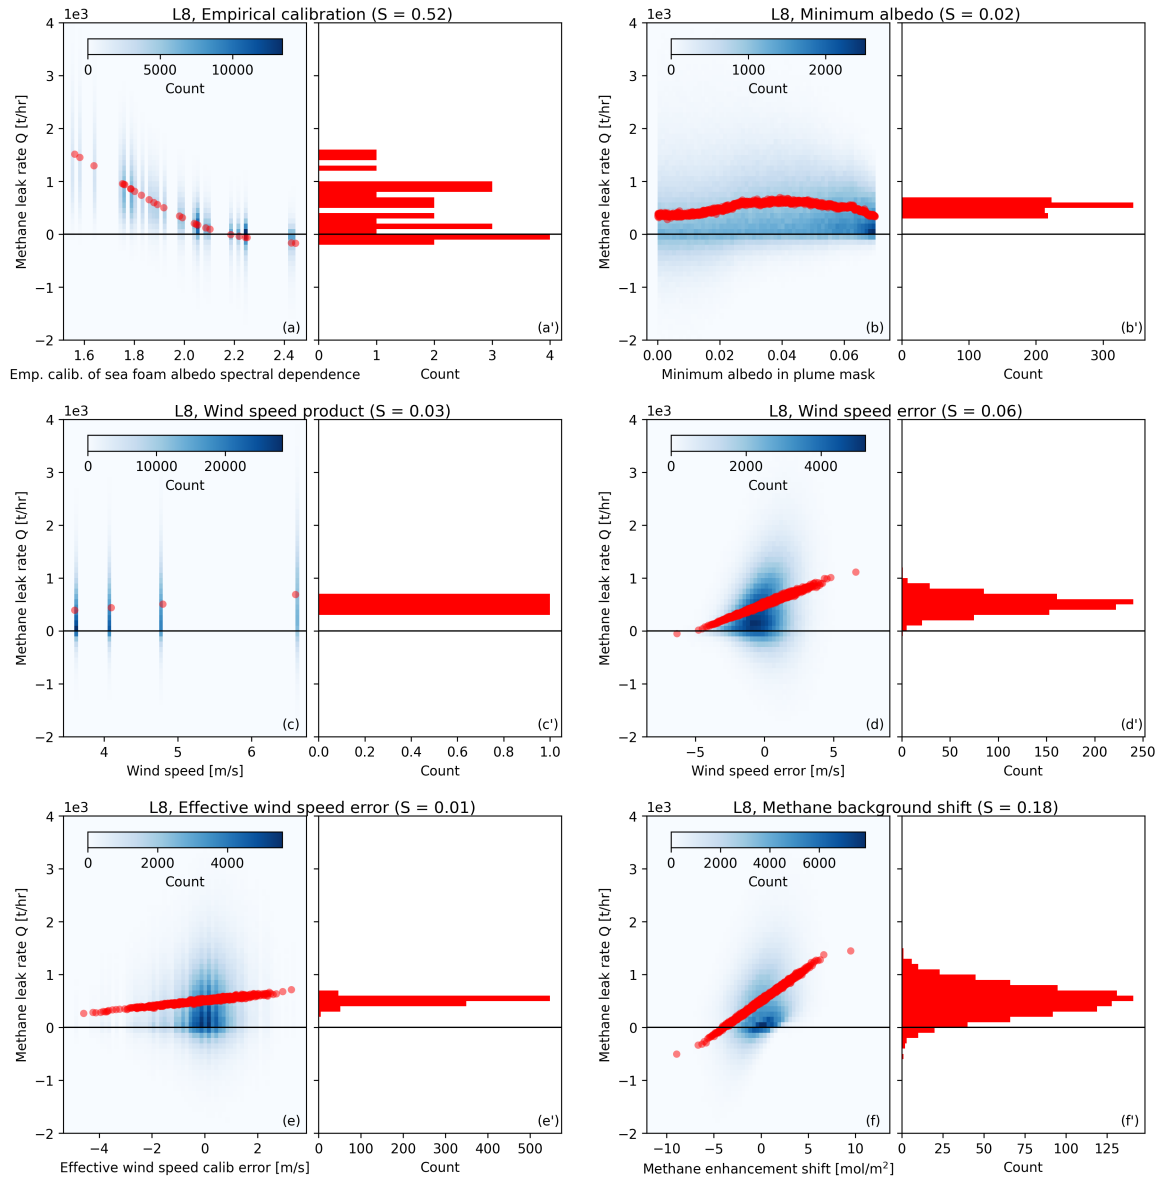

**Figure S9.** Two-dimensional histograms of Monte Carlo ensemble members showing the computed Landsat 8 methane leak rate  $Q$  against: (a) the empirical sea foam albedo spectral dependence, (b) the minimum albedo for pixels to be considered in the plume mask, (c) the wind speed product choice, (d) the wind speed error, (e) the effective wind speed calibration error, and (f) the methane background shift. Smoothed methane leak rate results  $E_{\sim X_i}(Q|X_i)$  are shown for all parameters with red points, and their respective distributions are shown in panels next to the two-dimensional histograms (a', b', c', d', e' and f', respectively). Titles include satellite and parameter names, along with the first-order sensitivity index  $S$  associated to each parameter.

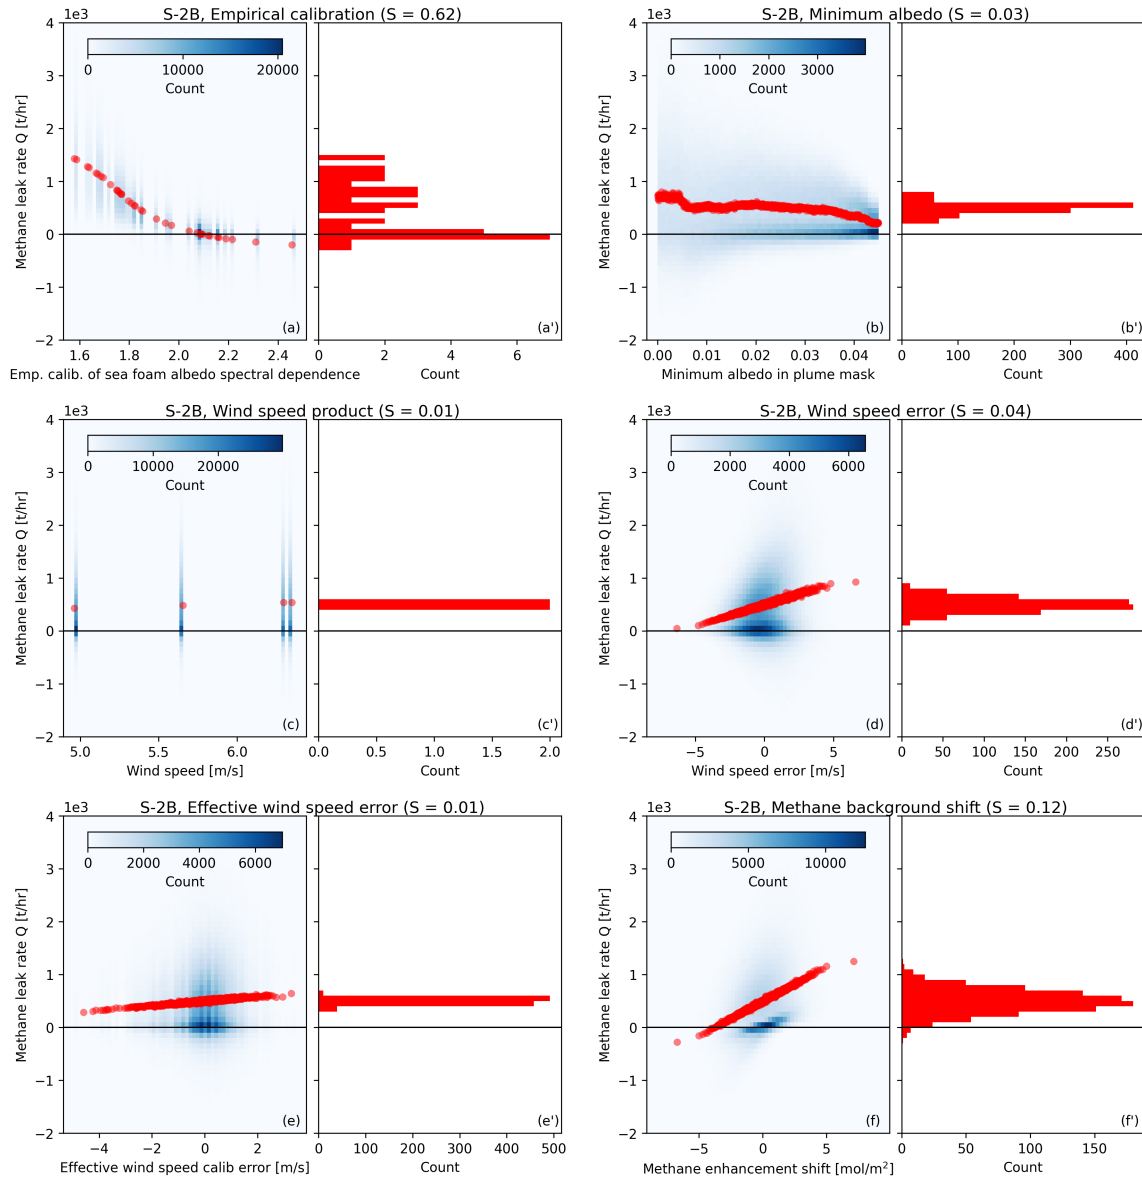

**Figure S10.** Two-dimensional histograms of Monte Carlo ensemble members showing the computed Sentinel-2B methane leak rate  $Q$  against: (a) the empirical sea foam albedo spectral dependence, (b) the minimum albedo for pixels to be considered in the plume mask, (c) the wind speed product choice, (d) the wind speed error, (e) the effective wind speed calibration error, and (f) the methane background shift. Smoothed methane leak rate results  $E_{\sim X_i}(Q|X_i)$  are shown for all parameters with red points, and their respective distributions are shown in panels next to the two-dimensional histograms (a', b', c', d', e' and f', respectively). Titles include satellite and parameter names, along with the first-order sensitivity index  $S$  associated to each parameter.
